# Supplementary material for: Global analysis of RNA-binding protein dynamics by comparative and enhanced RNA interactome capture
Source: Springer Nature journal article supplement (doi:10.1038/s41596-020-00404-1), 2020-11-18
Supplement: MOESM2 [file 41596_2020_404_MOESM2_ESM15.pdf]

## Reporting Summary

Nature Research wishes to improve the reproducibility of the work that we publish. This form provides structure for consistency and transparency in reporting. For further information on Nature Research policies, see [Authors & Referees](#) and the [Editorial Policy Checklist](#).

### Statistics

For all statistical analyses, confirm that the following items are present in the figure legend, table legend, main text, or Methods section.

n/a Confirmed

- The exact sample size ( $n$ ) for each experimental group/condition, given as a discrete number and unit of measurement
- A statement on whether measurements were taken from distinct samples or whether the same sample was measured repeatedly
- The statistical test(s) used AND whether they are one- or two-sided  
*Only common tests should be described solely by name; describe more complex techniques in the Methods section.*
- A description of all covariates tested
- A description of any assumptions or corrections, such as tests of normality and adjustment for multiple comparisons
- A full description of the statistical parameters including central tendency (e.g. means) or other basic estimates (e.g. regression coefficient) AND variation (e.g. standard deviation) or associated estimates of uncertainty (e.g. confidence intervals)
- For null hypothesis testing, the test statistic (e.g.  $F$ ,  $t$ ,  $r$ ) with confidence intervals, effect sizes, degrees of freedom and  $P$  value noted  
*Give  $P$  values as exact values whenever suitable.*
- For Bayesian analysis, information on the choice of priors and Markov chain Monte Carlo settings
- For hierarchical and complex designs, identification of the appropriate level for tests and full reporting of outcomes
- Estimates of effect sizes (e.g. Cohen's  $d$ , Pearson's  $r$ ), indicating how they were calculated

*Our web collection on [statistics for biologists](#) contains articles on many of the points above.*

### Software and code

Policy information about [availability of computer code](#)

|                 |                                                                                                                                                                                                                                                                                                                                                                |
|-----------------|----------------------------------------------------------------------------------------------------------------------------------------------------------------------------------------------------------------------------------------------------------------------------------------------------------------------------------------------------------------|
| Data collection | MaxQuant (version 1.5.0.35)                                                                                                                                                                                                                                                                                                                                    |
| Data analysis   | R version 3.6.1 (2019-07-05)<br>pheatmap_1.0.12<br>gridSVG_1.7-1<br>Biostrings_2.54.0<br>XVector_0.26.0<br>IRanges_2.20.1<br>S4Vectors_0.24.0<br>RColorBrewer_1.1-2<br>hwriter_1.3.2<br>RBDmap_0.0.17<br>XML_3.98-1.20<br>limma_3.42.0<br>Biobase_2.46.0<br>BiocGenerics_0.32.0<br>VennDiagram_1.6.20<br>futile.logger_1.4.3<br>ggrepel_0.8.1<br>ggplot2_3.2.1 |

For manuscripts utilizing custom algorithms or software that are central to the research but not yet described in published literature, software must be made available to editors/reviewers. We strongly encourage code deposition in a community repository (e.g. GitHub). See the Nature Research [guidelines for submitting code & software](#) for further information.

## Data

Policy information about [availability of data](#)

All manuscripts must include a [data availability statement](#). This statement should provide the following information, where applicable:

- Accession codes, unique identifiers, or web links for publicly available datasets
- A list of figures that have associated raw data
- A description of any restrictions on data availability

Raw and processed proteomic data is deposited to the ProteomeXchange Consortium via the PRIDE partner repository with the dataset identifier PXD009789. Original data was generated in 15 and was re-analyzed here to illustrate the analytical workflow (Figure 3 and 5).

## Field-specific reporting

Please select the one below that is the best fit for your research. If you are not sure, read the appropriate sections before making your selection.

Life sciences       Behavioural & social sciences       Ecological, evolutionary & environmental sciences

For a reference copy of the document with all sections, see [nature.com/documents/nr-reporting-summary-flat.pdf](https://www.nature.com/documents/nr-reporting-summary-flat.pdf)

## Life sciences study design

All studies must disclose on these points even when the disclosure is negative.

|                 |                                                                                                                               |
|-----------------|-------------------------------------------------------------------------------------------------------------------------------|
| Sample size     | 3 biological replicates with 3 experimental conditions each                                                                   |
| Data exclusions | No data excluded.                                                                                                             |
| Replication     | Experiments were performed from 3 biological replicates and in the primary papers candidate proteins were functionally tested |
| Randomization   | Not applicable                                                                                                                |
| Blinding        | Not applicable                                                                                                                |

## Reporting for specific materials, systems and methods

We require information from authors about some types of materials, experimental systems and methods used in many studies. Here, indicate whether each material, system or method listed is relevant to your study. If you are not sure if a list item applies to your research, read the appropriate section before selecting a response.

### Materials & experimental systems

| n/a                                 | Involvement in the study                                  |
|-------------------------------------|-----------------------------------------------------------|
| <input type="checkbox"/>            | <input checked="" type="checkbox"/> Antibodies            |
| <input type="checkbox"/>            | <input checked="" type="checkbox"/> Eukaryotic cell lines |
| <input checked="" type="checkbox"/> | <input type="checkbox"/> Palaeontology                    |
| <input checked="" type="checkbox"/> | <input type="checkbox"/> Animals and other organisms      |
| <input checked="" type="checkbox"/> | <input type="checkbox"/> Human research participants      |
| <input checked="" type="checkbox"/> | <input type="checkbox"/> Clinical data                    |

### Methods

| n/a                                 | Involvement in the study                        |
|-------------------------------------|-------------------------------------------------|
| <input checked="" type="checkbox"/> | <input type="checkbox"/> ChIP-seq               |
| <input checked="" type="checkbox"/> | <input type="checkbox"/> Flow cytometry         |
| <input checked="" type="checkbox"/> | <input type="checkbox"/> MRI-based neuroimaging |

## Antibodies

Antibodies used

$\beta$ -Actin (Sigma-Aldrich, A1978)  
 • Histone H4 (Abcam, ab10158)  
 • Polypyrimidine tract binding protein (PTBP1) (Sigma, WH0005725M1)  
 • Cold shock domain-containing protein E1 (CSDE1)/UNR (Proteintech, 13319-1-AP)  
 • Non-POU domain-containing octamer-binding protein (NonO) (Novus Biologicals, NBP1-95977)  
 • ELAV-like protein 1 (ELAVL1)/Hu-antigen R (HuR) (Proteintech, 11910-1-AP)

Validation

Antibodies are commercially available and validated by provider

## Eukaryotic cell lines

---

Policy information about [cell lines](#)

Cell line source(s)

HeLa cells (ATCC, cat. no. CCL-2)  
Jurkat cells (DSMZ, ACC-282)  
HEK293 (ECACC, #85120602)

Authentication

Cell lines authenticated by supplier

Mycoplasma contamination

All lines are tested regularly and are negative

Commonly misidentified lines  
(See [ICLAC](#) register)

None
